# Supplementary material for: Colchicine Use and Major Adverse Cardiovascular Events in Male Patients with Gout and Established Coronary Artery Disease: A Veterans Affairs Nested Retrospective Cohort Study
Source: MDPI journal article supplement (doi:10.3390/gucdd1010003), 2023-03-15
Supplement: s1 [file s1]

**Table S1.** Comparison of baseline characteristics between all Quartiles (1–4).

| Variable                                             | Quartile 1<br>(n = 60) | Quartile 2<br>(n = 60) | Quartile 3<br>(n = 60) | Quartile 4<br>(n = 59) |
|------------------------------------------------------|------------------------|------------------------|------------------------|------------------------|
| Age, years $\pm$ SD                                  | 79 $\pm$ 10            | 78 $\pm$ 9             | 78 $\pm$ 10            | 76 $\pm$ 9             |
| Body Mass Index, kg/m <sup>2</sup> $\pm$ SD          | 30.8 $\pm$ 4.6         | 30.6 $\pm$ 6.6         | 31.2 $\pm$ 5.8         | 31.0 $\pm$ 5.1         |
| Diabetes Mellitus                                    | 40.7%                  | 44.1%                  | 48.3%                  | 39.0%                  |
| Hypertension                                         | 91.5%                  | 88.1%                  | 90.0%                  | 84.7%                  |
| Systolic Blood Pressure, mmHg $\pm$ SD               | 131 $\pm$ 21           | 130 $\pm$ 28           | 132 $\pm$ 20           | 129 $\pm$ 20           |
| Diastolic Blood Pressure, mmHg $\pm$ SD              | 74 $\pm$ 11            | 74 $\pm$ 15            | 75 $\pm$ 13            | 73 $\pm$ 12            |
| Dyslipidemia                                         | 71.1%                  | 83.1%                  | 70.0%                  | 81.4%                  |
| LDL Cholesterol, mg/dL $\pm$ SD                      | 116 $\pm$ 46           | 94 $\pm$ 26            | 105 $\pm$ 38           | 94 $\pm$ 26            |
| Prior Myocardial Infarction                          | 41.7%                  | 49.2%                  | 44.1%                  | 49.2%                  |
| Prior Coronary Artery Bypass Graft                   | 26.7%                  | 33.3%                  | 28.3%                  | 23.7%                  |
| Prior Percutaneous Coronary Intervention             | 28.3%                  | 35.0%                  | 38.3%                  | 35.6%                  |
| Chronic Kidney Disease                               | 41.4%                  | 44.8%                  | 41.7%                  | 44.1%                  |
| Serum Creatinine, mg/dL $\pm$ SD                     | 1.5 $\pm$ 0.8          | 1.5 $\pm$ 0.6          | 1.6 $\pm$ 0.6          | 1.4 $\pm$ 0.5          |
| History of Tobacco Use                               | 83.3%                  | 78.0%                  | 83.3%                  | 81.4%                  |
| Current Tobacco Use                                  | 16.9%                  | 15.3%                  | 8.5%                   | 18.6%                  |
| Allopurinol Use                                      | 36.7%                  | 20.3%                  | 33.3%                  | 18.6%                  |
| Serum Uric Acid, mg/dL $\pm$ SD                      | 8.2 $\pm$ 2.0          | 8.9 $\pm$ 2.0          | 8.7 $\pm$ 2.3          | 8.9 $\pm$ 2.0          |
| NSAID Use                                            | 38.3%                  | 30.0%                  | 28.3%                  | 23.7%                  |
| Aspirin Use                                          | 55.0%                  | 63.3%                  | 58.3%                  | 62.7%                  |
| Statin Use                                           | 53.3%                  | 65.0%                  | 66.7%                  | 74.6%                  |
| ACE inhibitor Use                                    | 38.3%                  | 61.7%                  | 53.3%                  | 55.9%                  |
| $\beta$ -blocker Use                                 | 70.0%                  | 63.3%                  | 78.3%                  | 72.9%                  |
| Any Antihypertensive Use                             | 55.0%                  | 70.0%                  | 86.7%                  | 69.5%                  |
| Mean Daily Colchicine Dose, mg $\pm$ SD              | 0.73 $\pm$ 0.31        | 0.78 $\pm$ 0.26        | 0.66 $\pm$ 0.18        | 0.69 $\pm$ 0.22        |
| Time on Colchicine, % of observation period $\pm$ SD | 11.4 $\pm$ 4.9         | 31.3 $\pm$ 7.4         | 56.6 $\pm$ 7.8         | 88.5 $\pm$ 9.9         |

Continuous data are shown as mean  $\pm$  standard deviation. Categorical data are shown as a percentage of the total subgroup. SD, standard deviation; LDL, low-density lipoprotein; NSAID, nonsteroidal anti-inflammatory drug; ACE, angiotensin-converting enzyme.

**Table S2.** Total Major Adverse Cardiovascular Events and Component Events in Colchicine Users and Nonusers.

| Major Adverse Cardiovascular Event              | Nonusers<br>(n = 116) | Colchicine Users<br>(n = 239) |
|-------------------------------------------------|-----------------------|-------------------------------|
| Total First Major Adverse Cardiovascular Events | 17                    | 43                            |
| Myocardial Infarction                           | 7                     | 24                            |
| Coronary Artery Bypass Graft                    | 3                     | 9                             |
| Cerebrovascular Accident                        | 6                     | 6                             |
| All-cause mortality                             | 2                     | 8                             |

The Total First Major Adverse Cardiovascular Events row displays the number of patients experiencing first-observed MACE within each group. Subsequent events for each individual patient were censored for logistic regression and Kaplan Meier analysis.

**Table S3.** Total Major Adverse Cardiovascular Events and Component Events in Each Colchicine-use Quartile.

| Major Adverse Cardiovascular Event              | Quartile 1<br>(n = 60) | Quartile 2<br>(n = 60) | Quartile 3<br>(n = 60) | Quartile 4<br>(n = 59) |
|-------------------------------------------------|------------------------|------------------------|------------------------|------------------------|
| Total First Major Adverse Cardiovascular Events | 10                     | 15                     | 13                     | 5                      |
| Myocardial Infarction                           | 7                      | 7                      | 7                      | 3                      |
| Coronary Artery Bypass Graft                    | 2                      | 3                      | 3                      | 1                      |
| Cerebrovascular Accident                        | 0                      | 2                      | 3                      | 1                      |
| All-cause mortality                             | 2                      | 5                      | 1                      | 0                      |

The Total First Major Adverse Cardiovascular Events row displays the number of patients experiencing first-observed MACE within each quartile. Subsequent events for each individual patient were censored for logistic regression and Kaplan Meier analysis.
