# Supplementary material for: Colchicine Use and Major Adverse Cardiovascular Events in Male Patients with Gout and Established Coronary Artery Disease: A Veterans Affairs Nested Retrospective Cohort Study
Source: MDPI journal article supplement (doi:10.3390/gucdd1010003), 2023-03-15
Supplement: s1 [file s1]

Archive with 1 entries (1 files):
- gucdd-2052971-supplementary.pdf
